# Supplementary material for: Comprehensive Analysis of Highbush Blueberry Plants Propagated In Vitro and Conventionally
Source: MDPI journal article supplement (doi:10.3390/ijms25010544), 2023-12-30
Supplement: s1 [file s1]

## Highbush blueberries *in vitro* culture axillary shoots derived

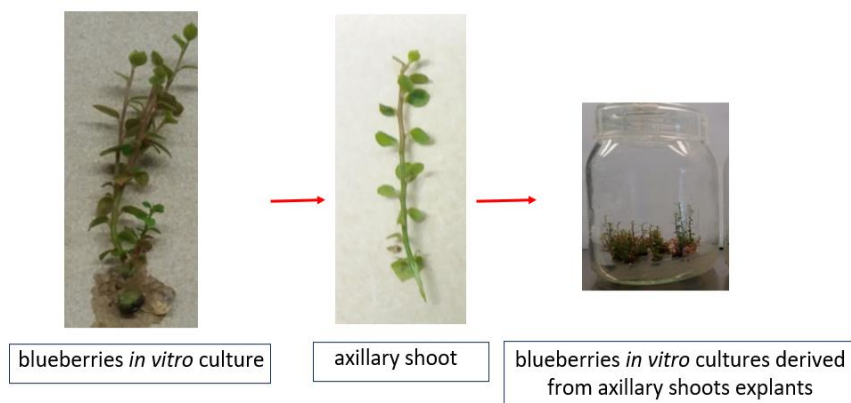

## Highbush blueberries *in vitro* culture adventitious shoots derived

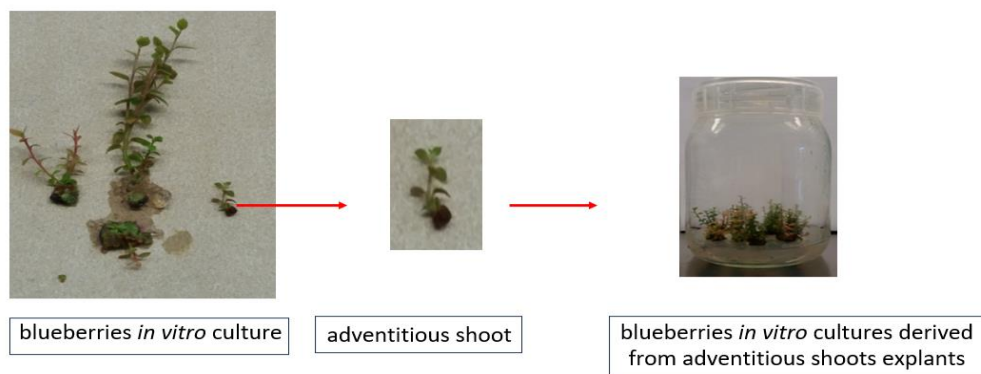

## Rooting of 2-node semi-woody cuttings

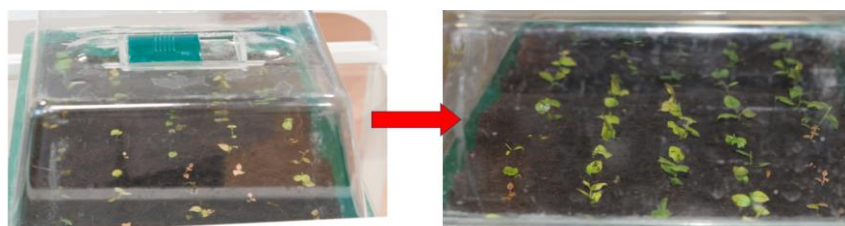

## Cultivation of highbush blueberries plants in tops

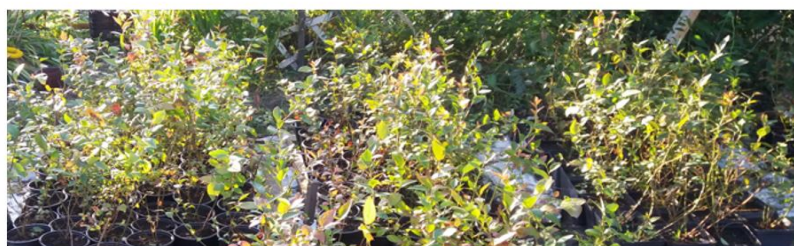

TC-Ax

SC

TC-Ad

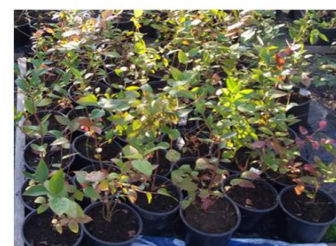

TC/SC
